# Supplementary material
Source: PubMed Central journal article supplement (PMC6723233)

# Ileum

## A Pathway associated metabolite set

Metabolite Sets Enrichment Overview

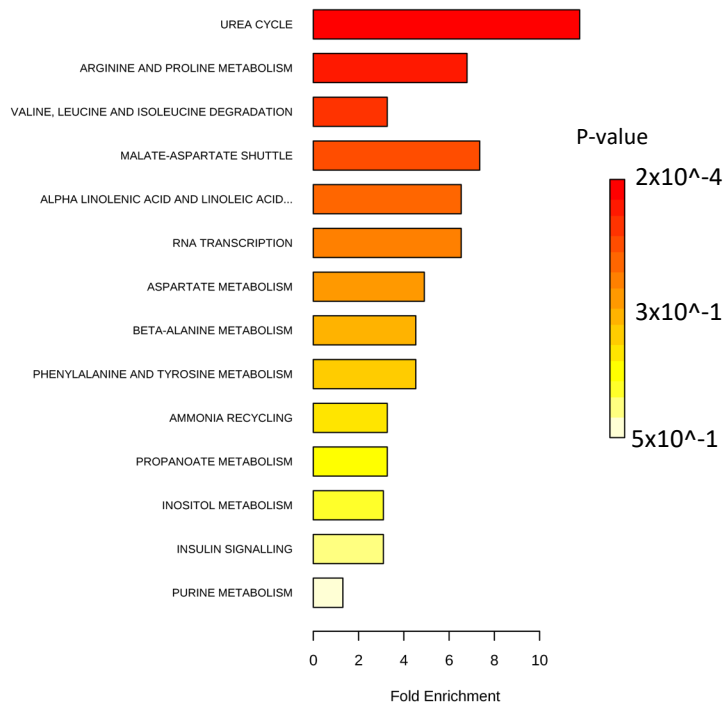

## B Disease associated metabolite set

Metabolite Sets Enrichment Overview

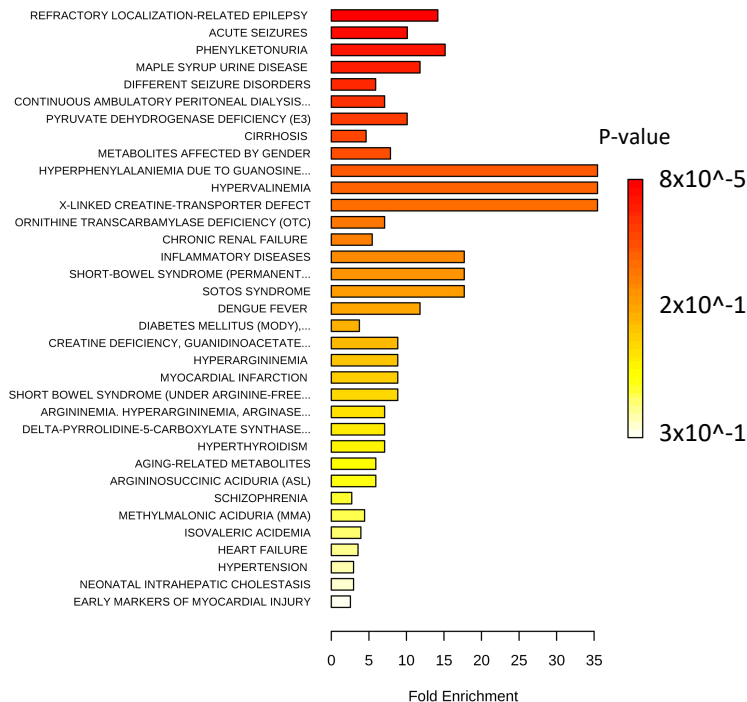

## C Predicted metabolite set

Enrichment Overview (top 50)

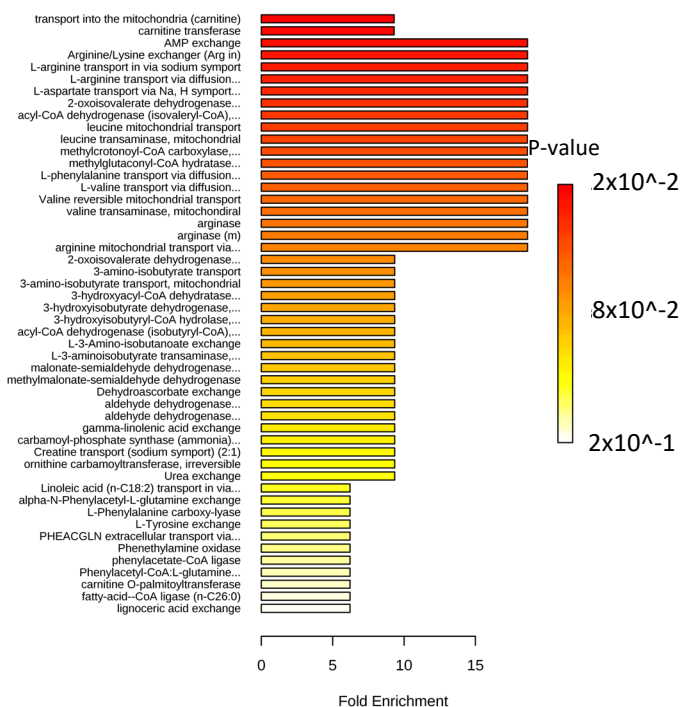

## D Location metabolite set

Metabolite Sets Enrichment Overview

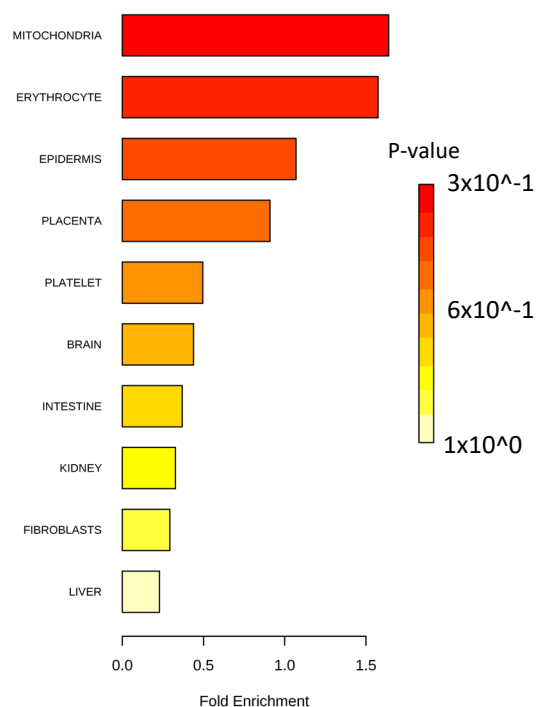

Supplement: mmc2.pdf [file mmc2.pdf]
