# Supplementary material
Source: PubMed Central journal article supplement (PMC6723233)

# Jejunum

## A Pathway associated metabolite set

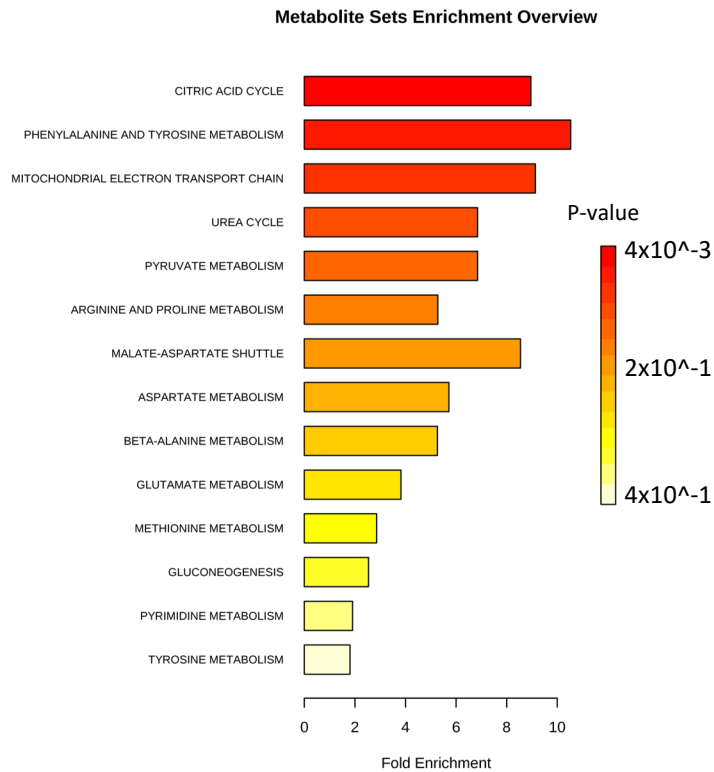

## B Disease associated metabolite set (Blood)

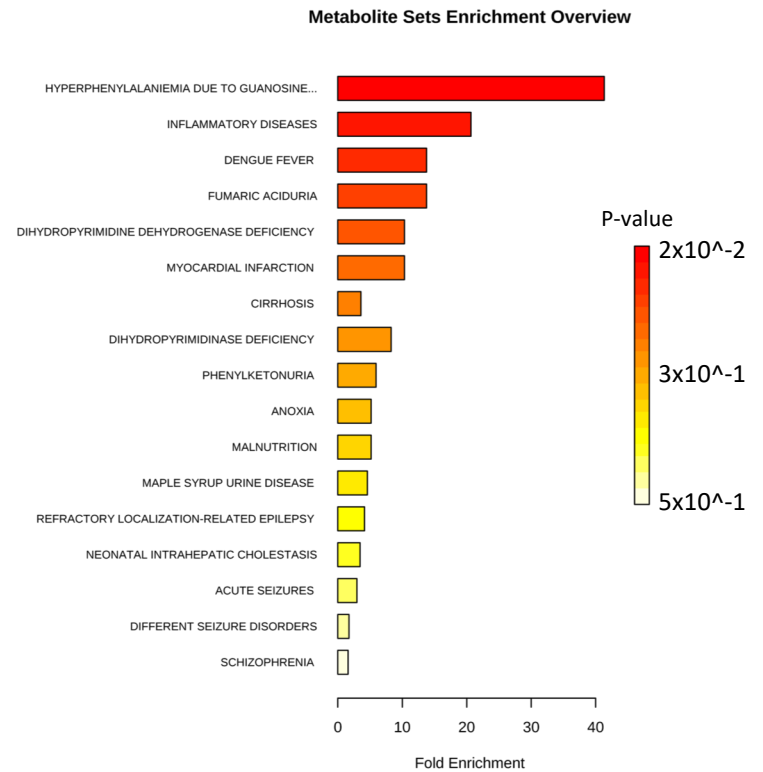

## C Predicted metabolite set

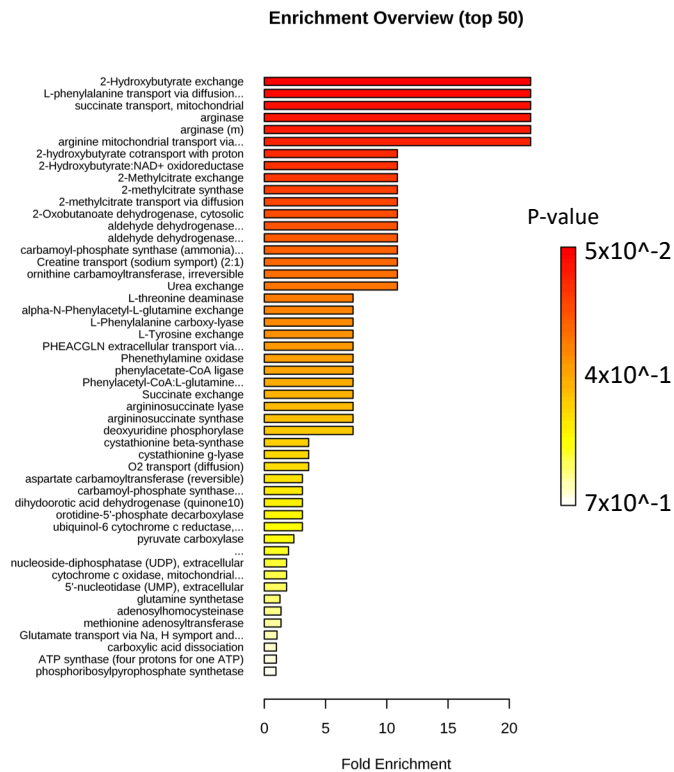

## D Location metabolite set

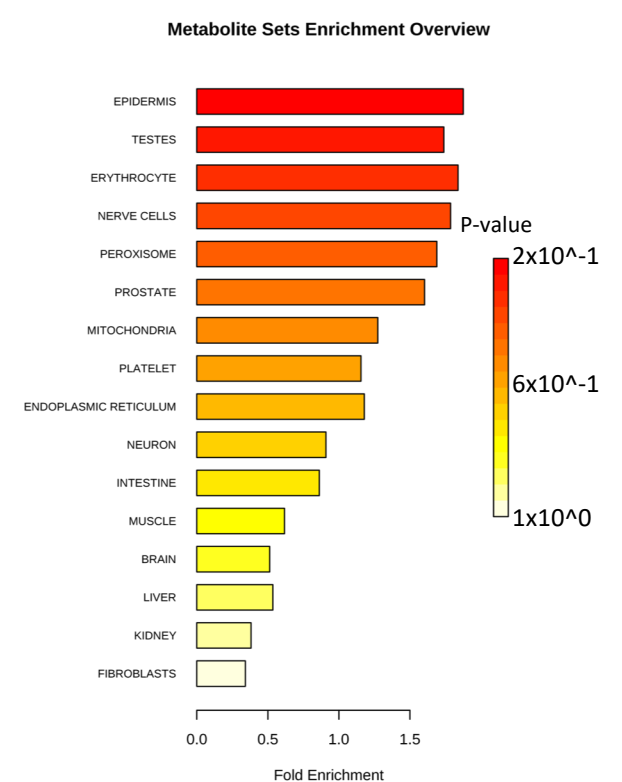

Supplement: mmc4.pdf [file mmc4.pdf]
