# Supplementary material
Source: PubMed Central journal article supplement (PMC6723233)

# Skeletal Muscle (Medial Gastrocnemius)

## A Pathway associated metabolite set

Metabolite Sets Enrichment Overview

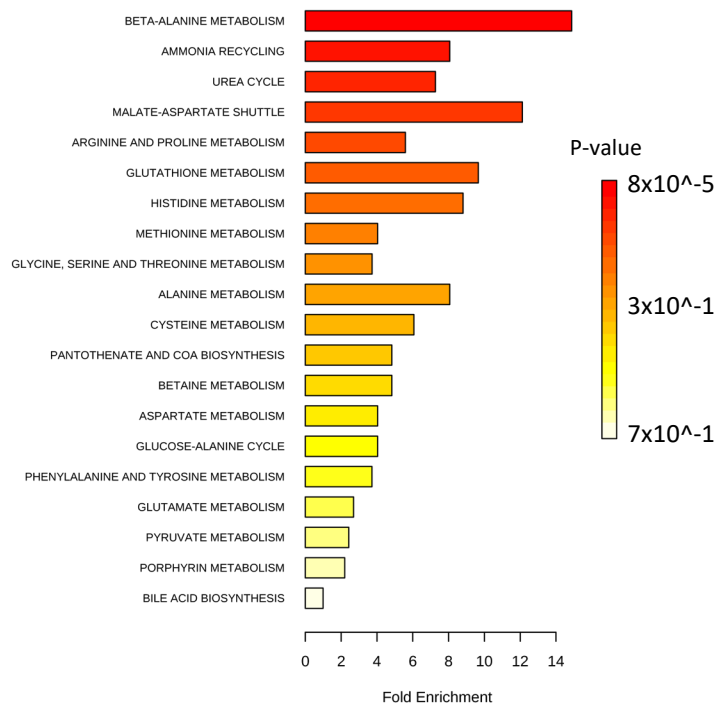

## B Disease associated metabolite set (CSF)

Metabolite Sets Enrichment Overview

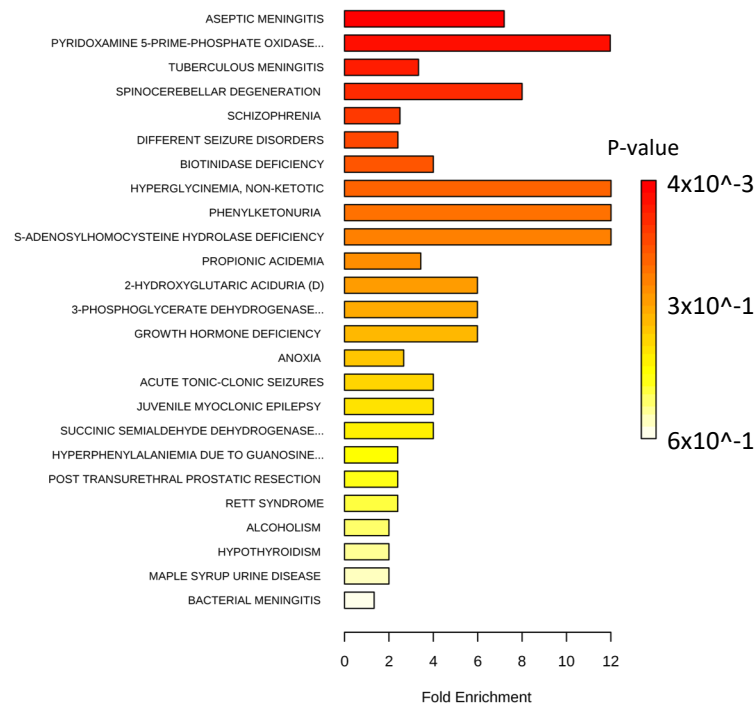

## C Predicted metabolite set

Enrichment Overview (top 50)

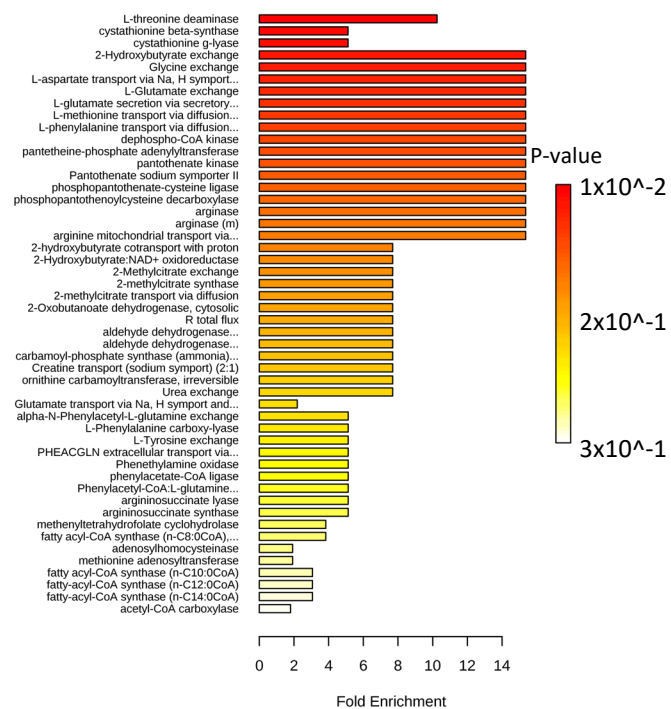

## D Location metabolite set

Metabolite Sets Enrichment Overview

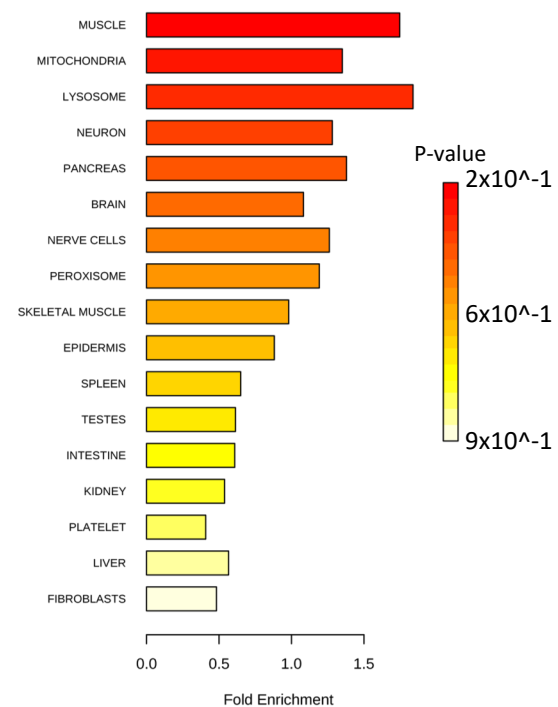

Supplement: mmc6.pdf [file mmc6.pdf]
