# Supplementary material
Source: PubMed Central journal article supplement (PMC6723233)

# Ileum

Control

Sepsis

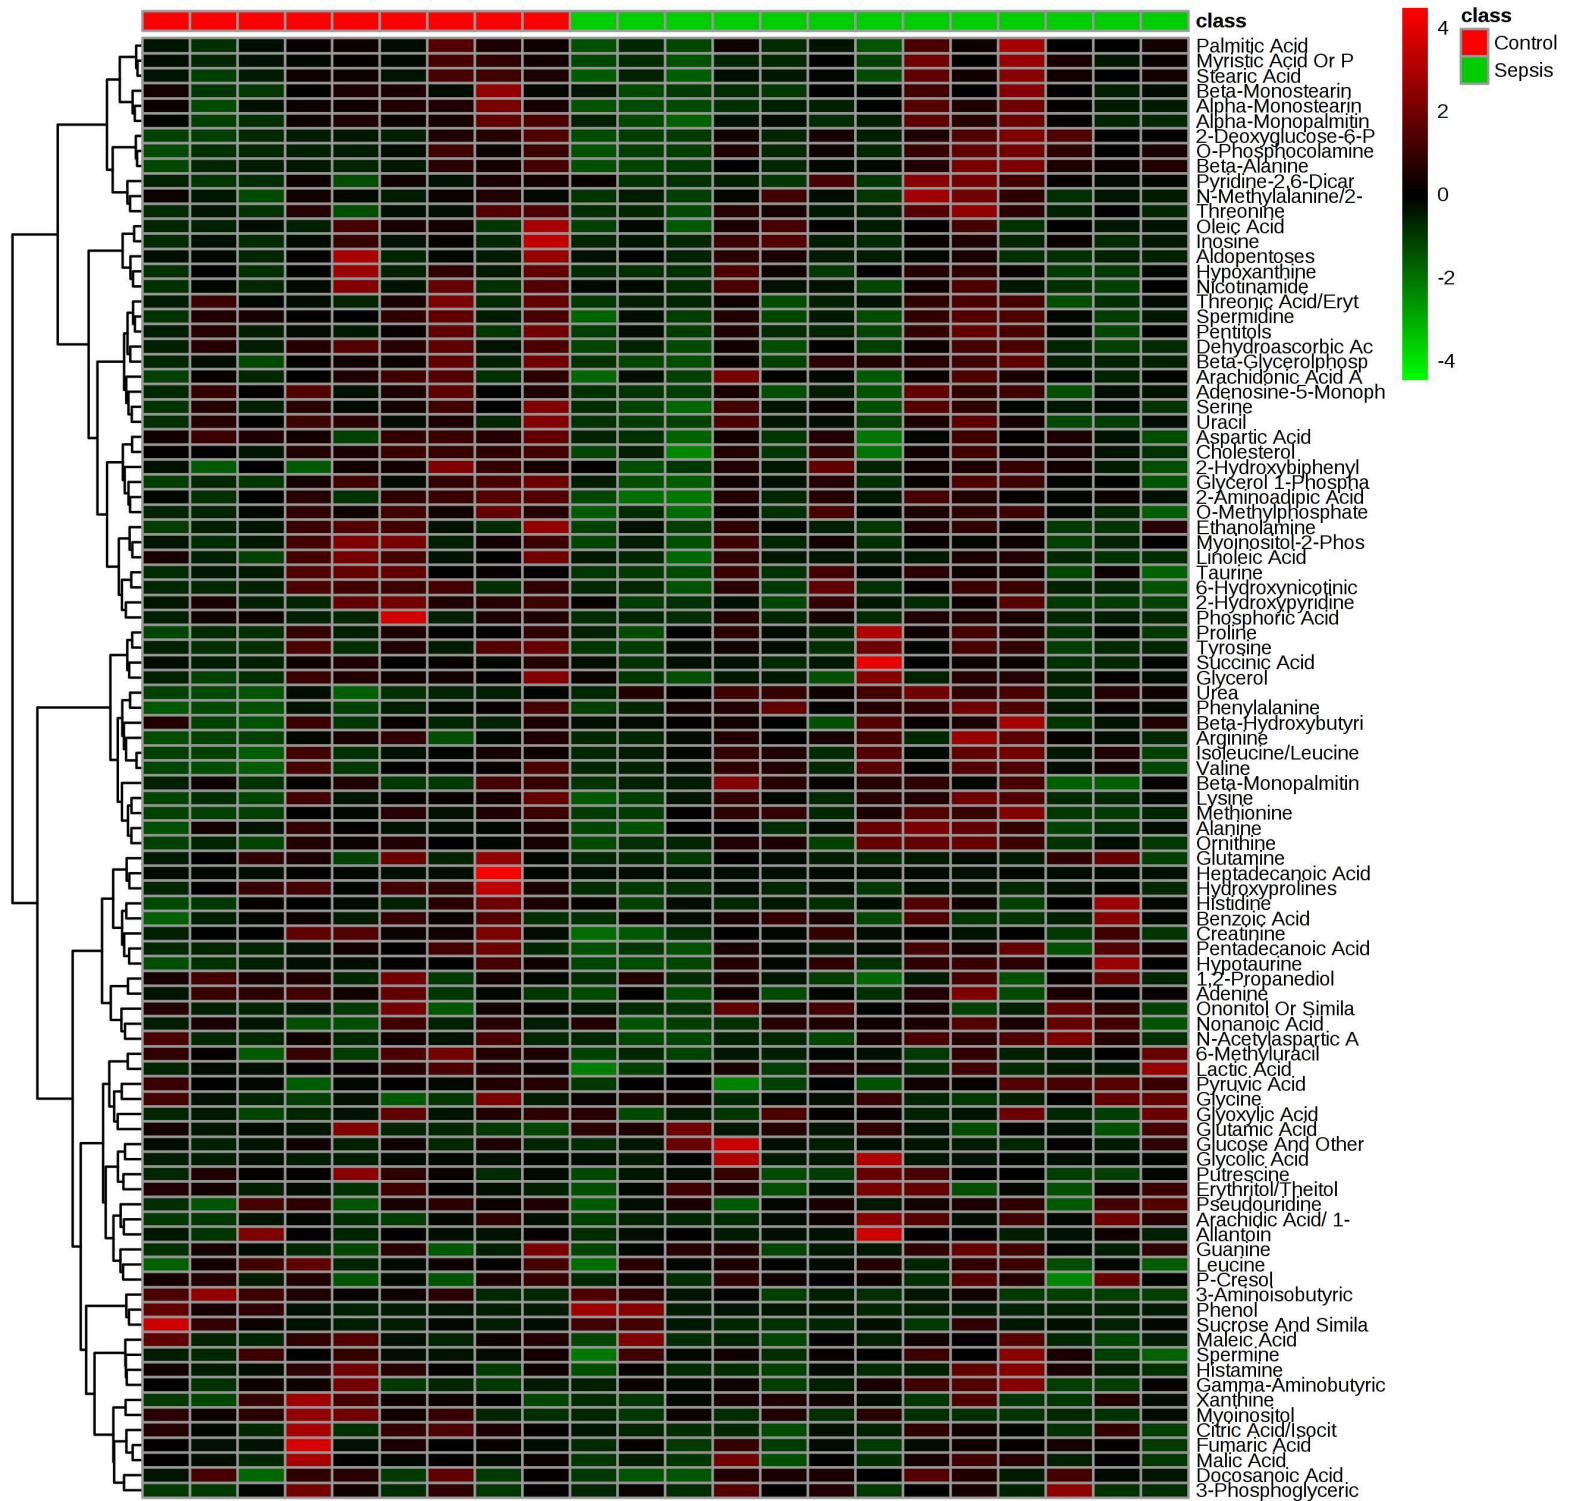

Supplemental Figure 1

Supplement: mmc1.pdf [file mmc1.pdf]

# Lung

## A Pathway associated metabolite set

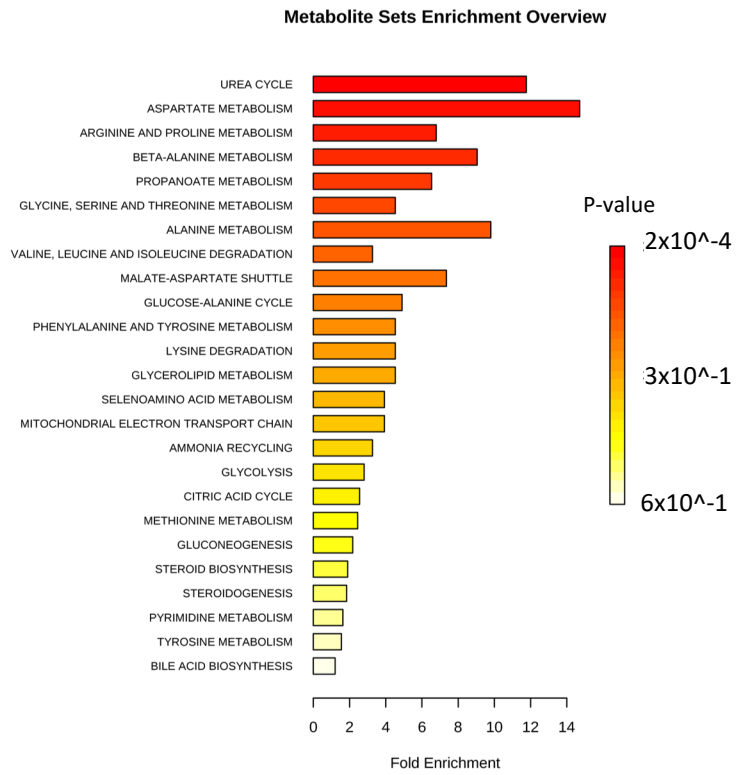

## B Location metabolite set

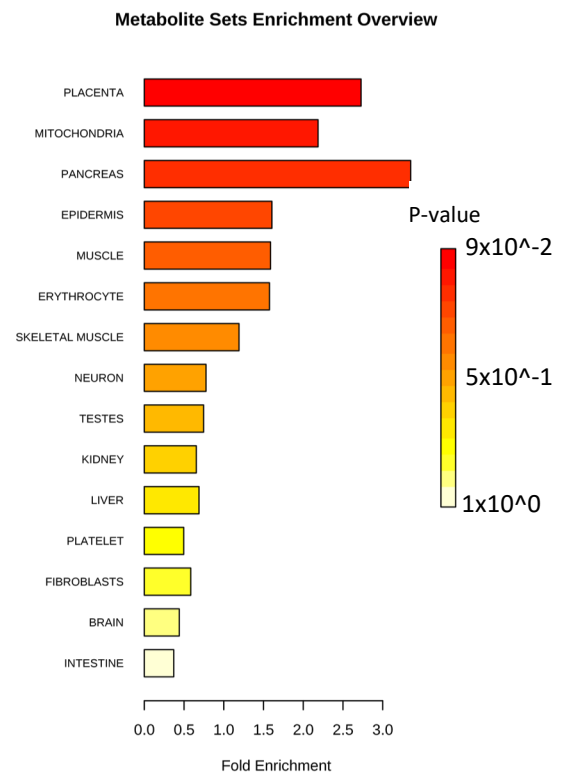

Supplement: mmc10.pdf [file mmc10.pdf]

# Jejunum

Control

Sepsis

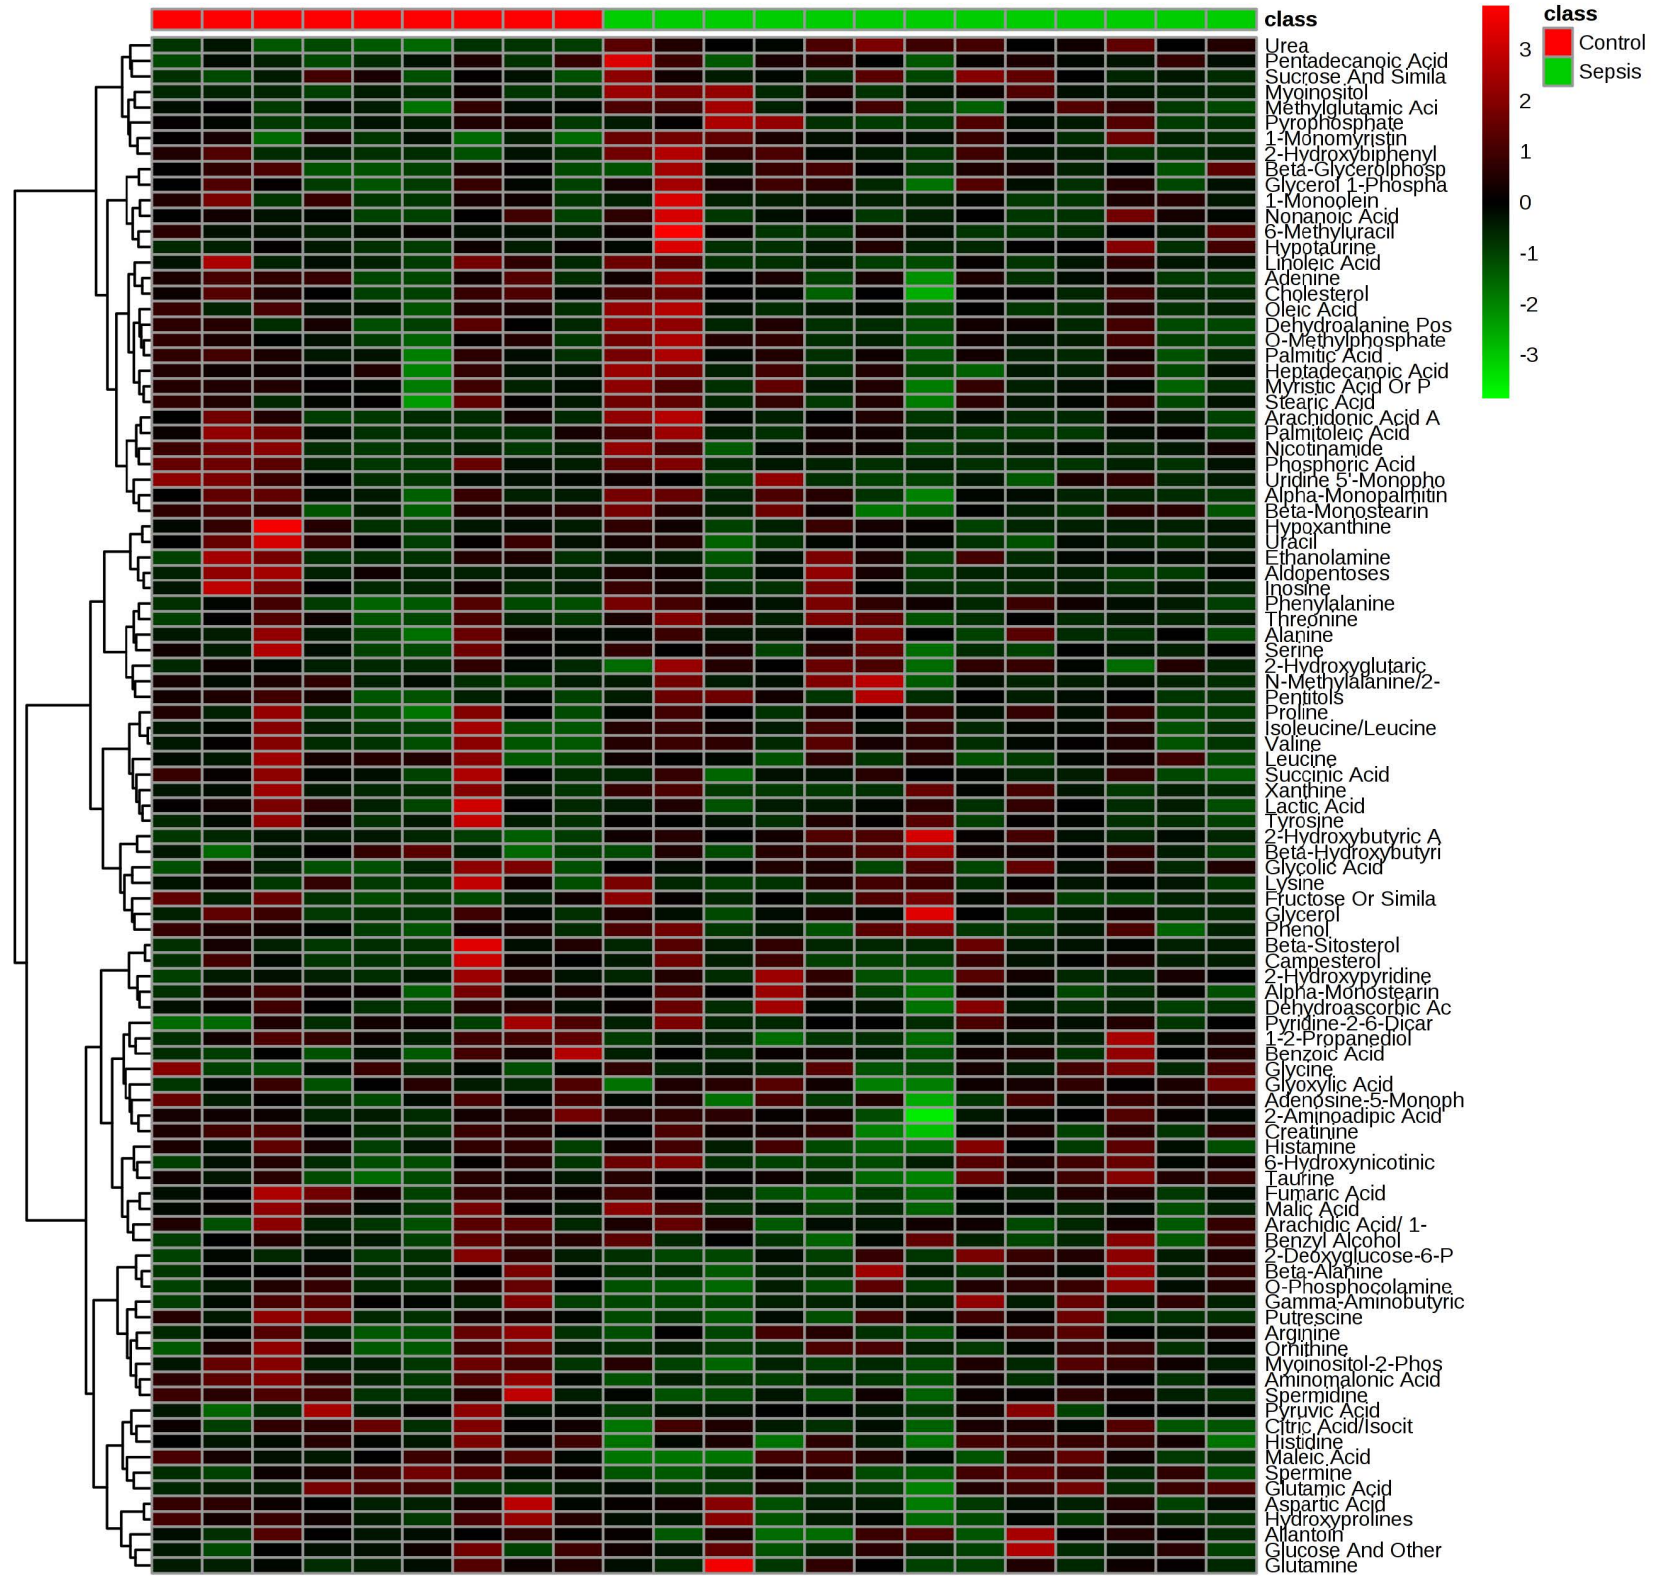

Supplemental Figure 3

Supplement: mmc3.pdf [file mmc3.pdf]

# Skeletal Muscle (Medial Gastrocnemius)

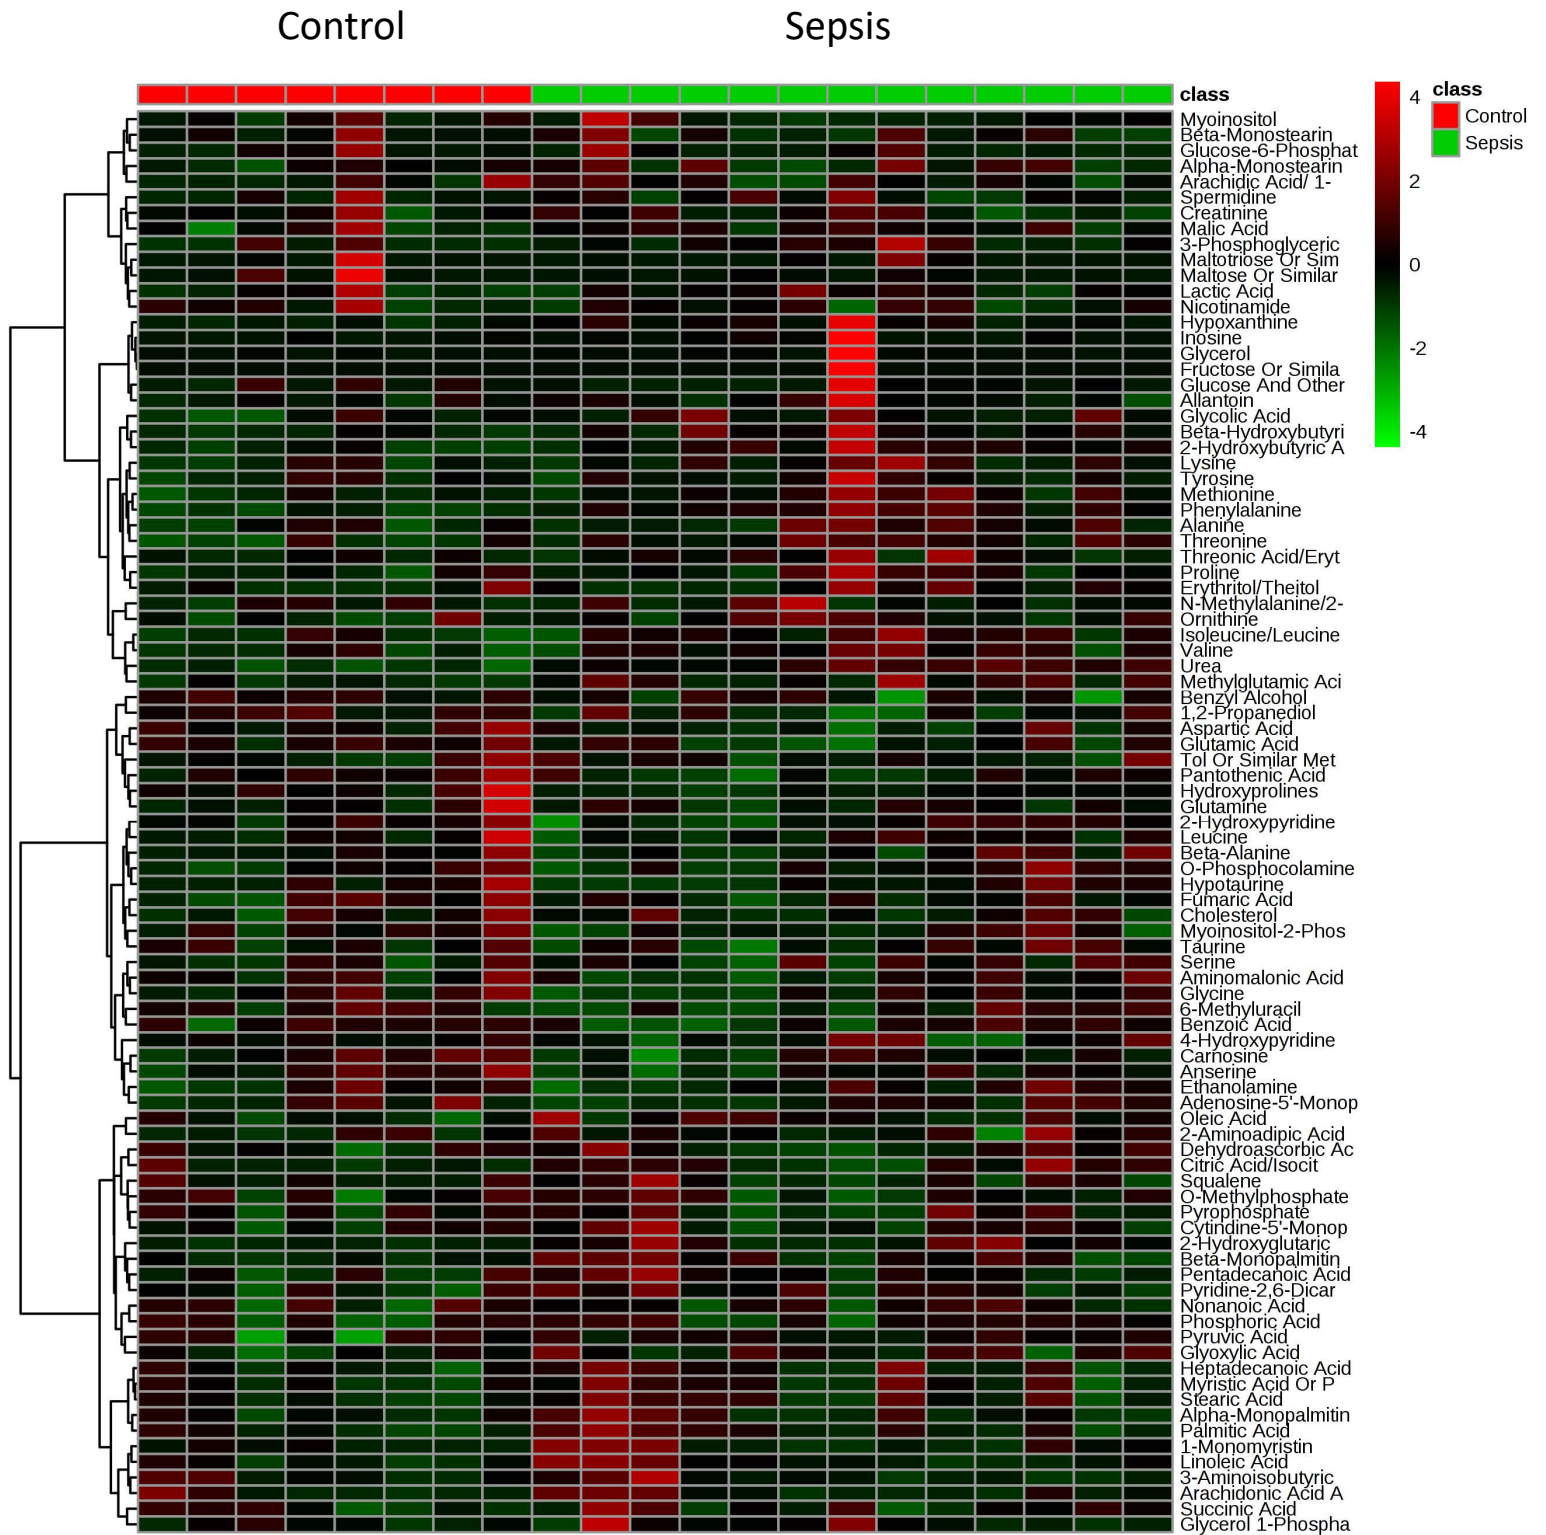

Supplemental Figure 5

Supplement: mmc5.pdf [file mmc5.pdf]

# Liver

Control

Sepsis

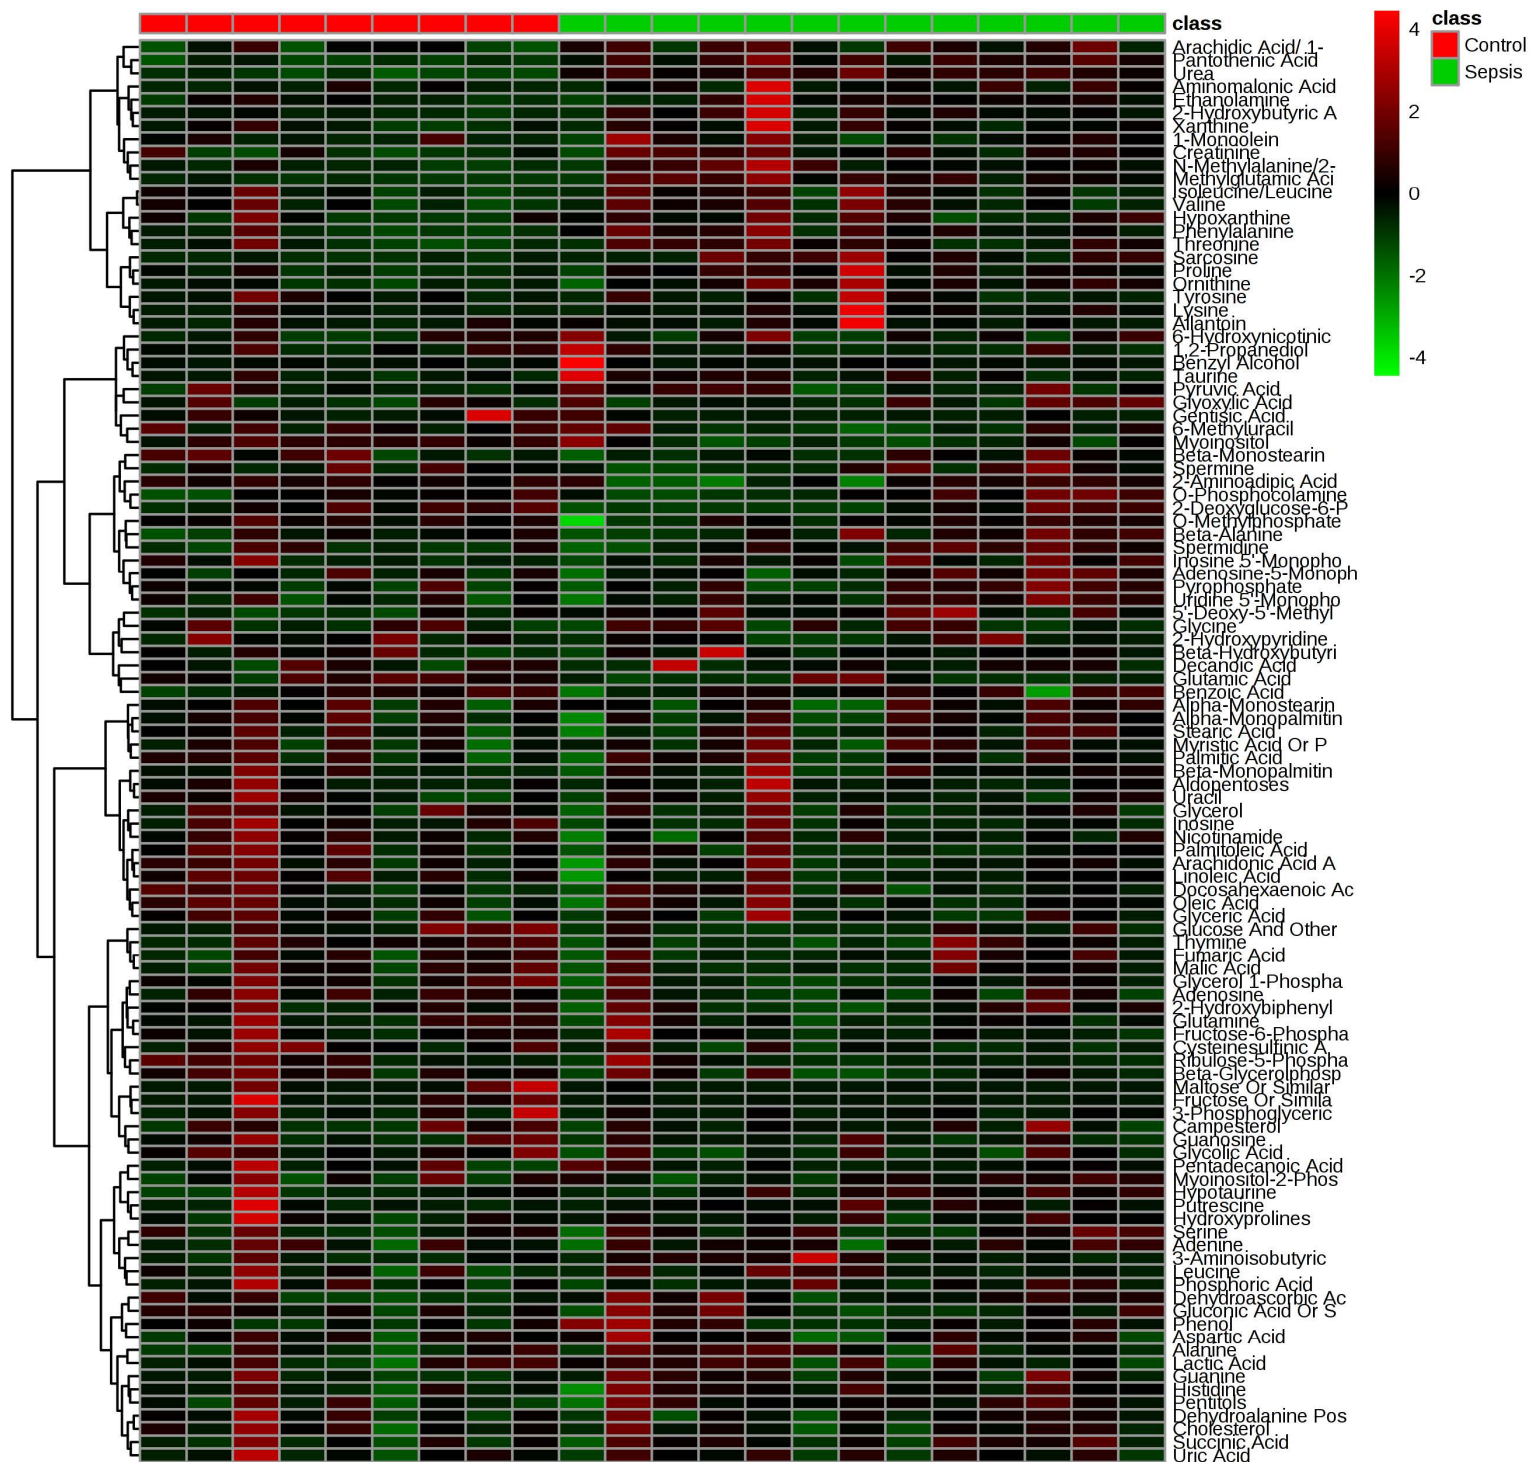

Supplemental Figure 7

Supplement: mmc7.pdf [file mmc7.pdf]

# Liver

## Pathway associated metabolite set Metabolite Sets Enrichment Overview

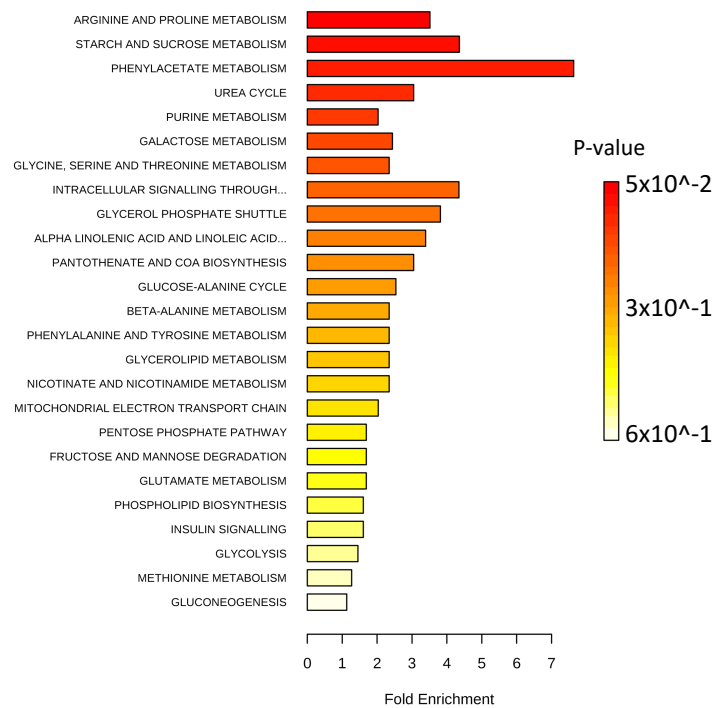

Supplement: mmc8.pdf [file mmc8.pdf]

# Lung

Control

Sepsis

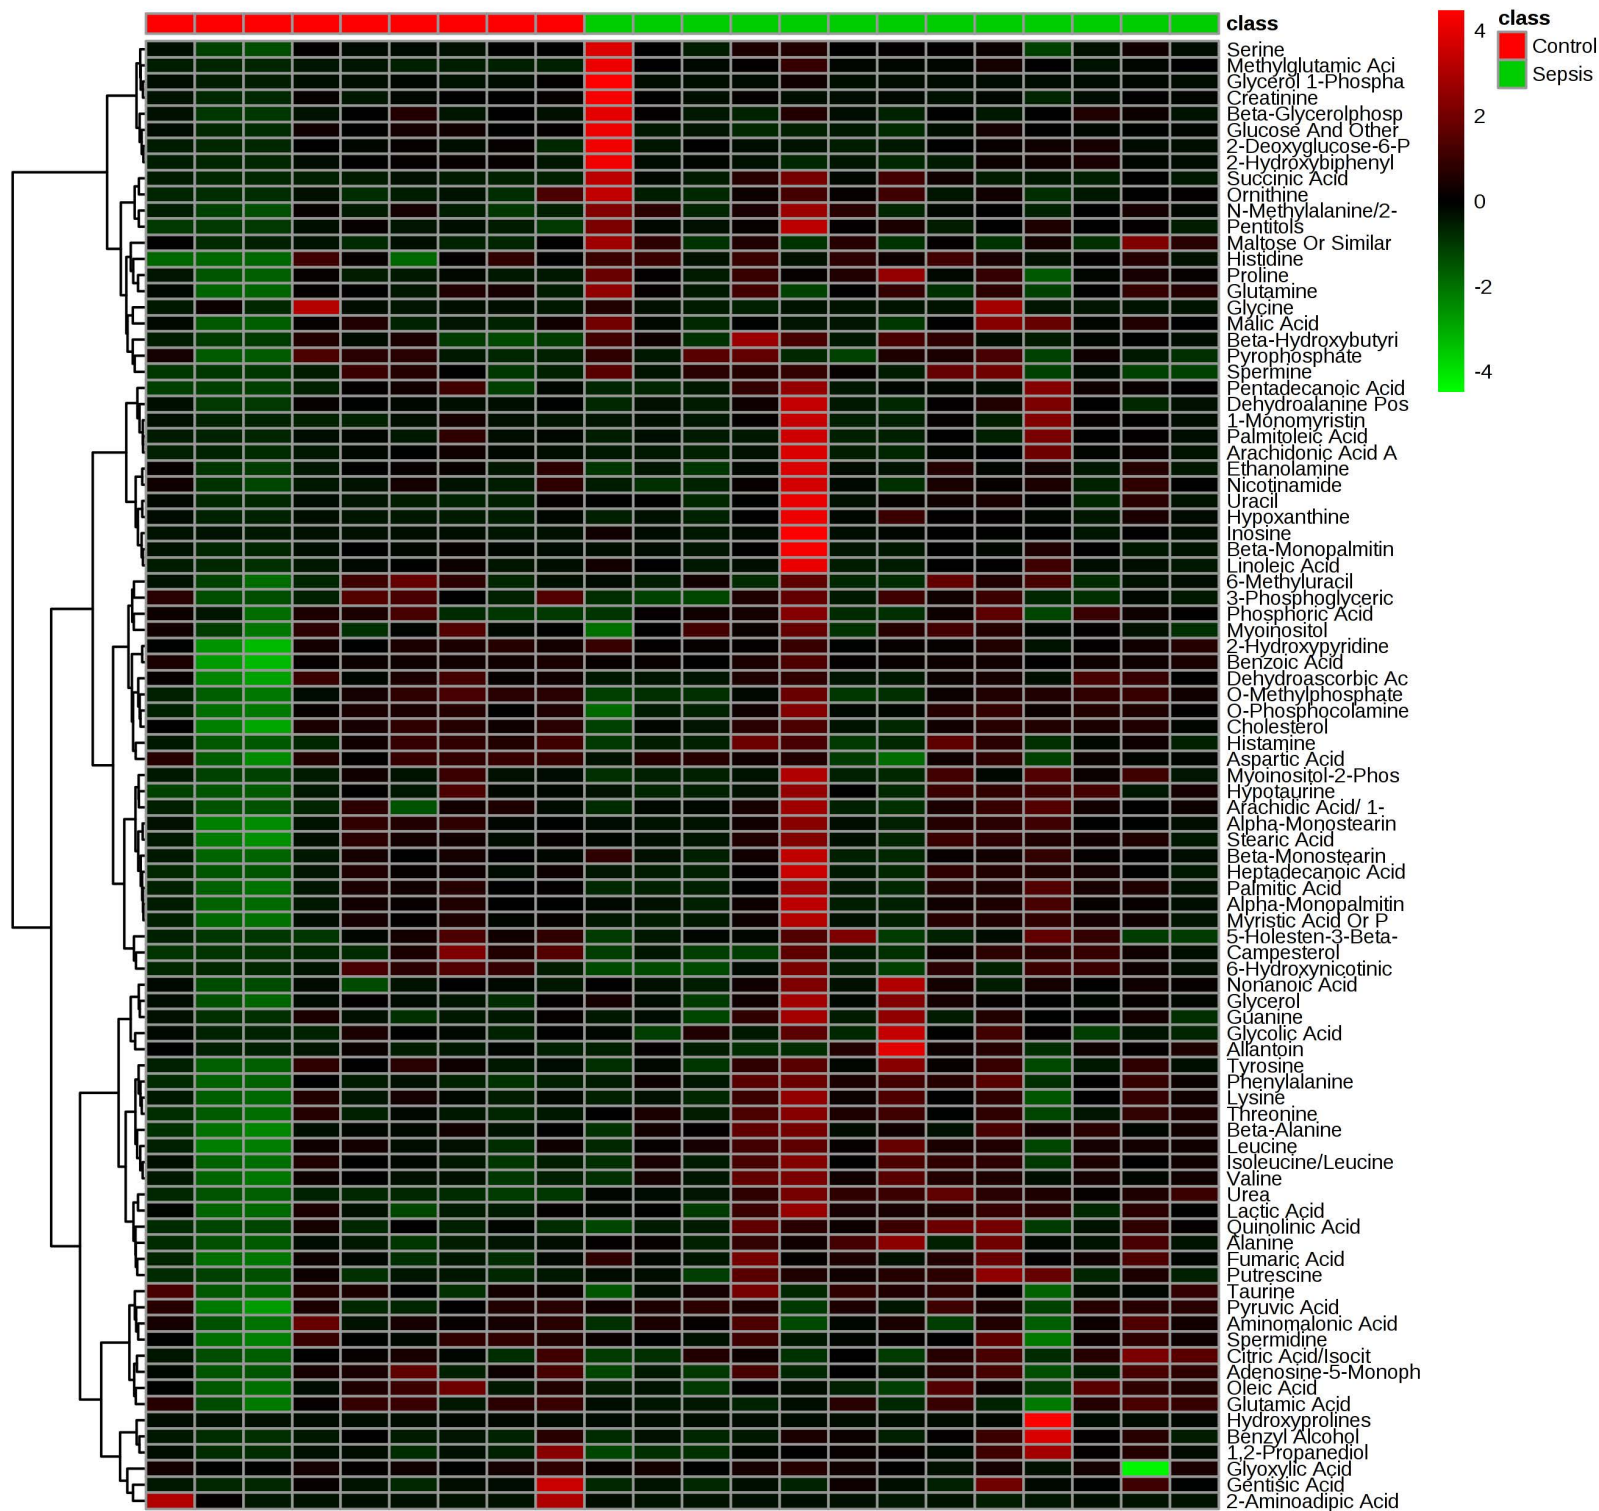

Supplemental Figure 9

Supplement: mmc9.pdf [file mmc9.pdf]
